# Supplementary material for: Polymer chemistry informed neural networks (PCINNs) for data-driven modelling of polymerization processes
Source: Royal Society of Chemistry journal article supplement (doi:10.1039/d4py00995a), 2024-01-01
Supplement: d4py00995a1.pdf [file d4py00995a1.pdf]

# Polymer Chemistry Informed Neural Networks (PCINNs) for data-driven modelling of polymerization processes

Nicholas Ballard\*, Jon Larrañaga, Kiarash Farajzadehahary, and José M. Asua

## SUPPORTING INFORMATION

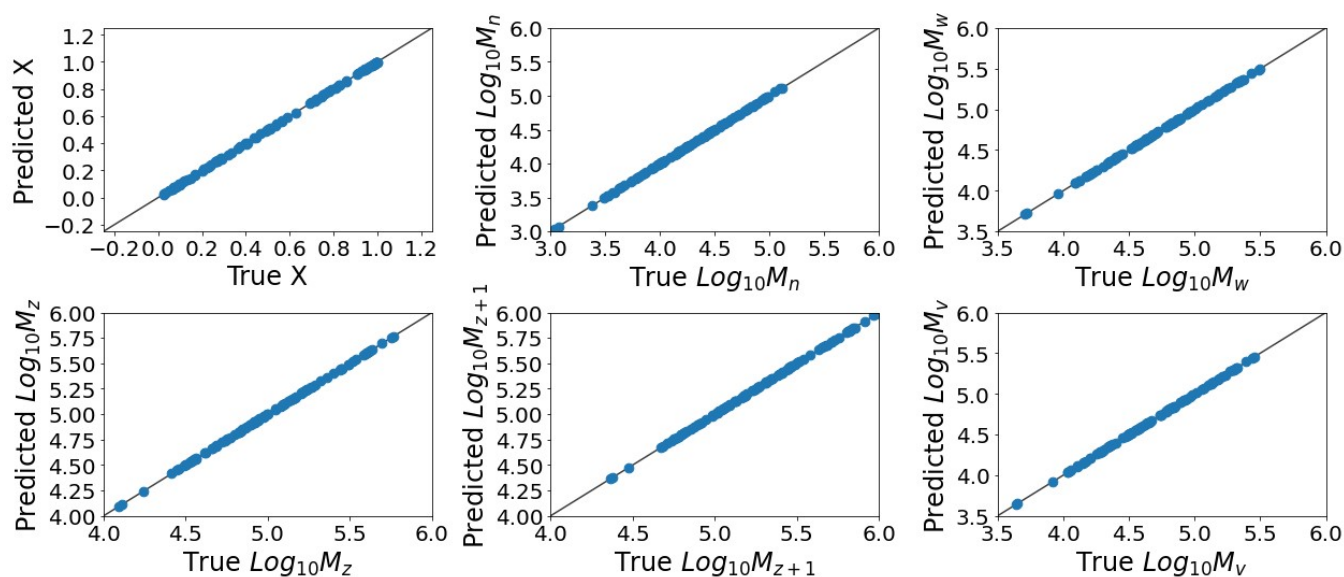

**Figure S1.** Performance of theory neural network by comparison of predicted values from the “theory” neural network and the values from the kinetic model for 100 different randomly selected sets of ( $[M]$ ,  $[I]$ ,  $[S]$ ,  $T$  and time) from the test set.

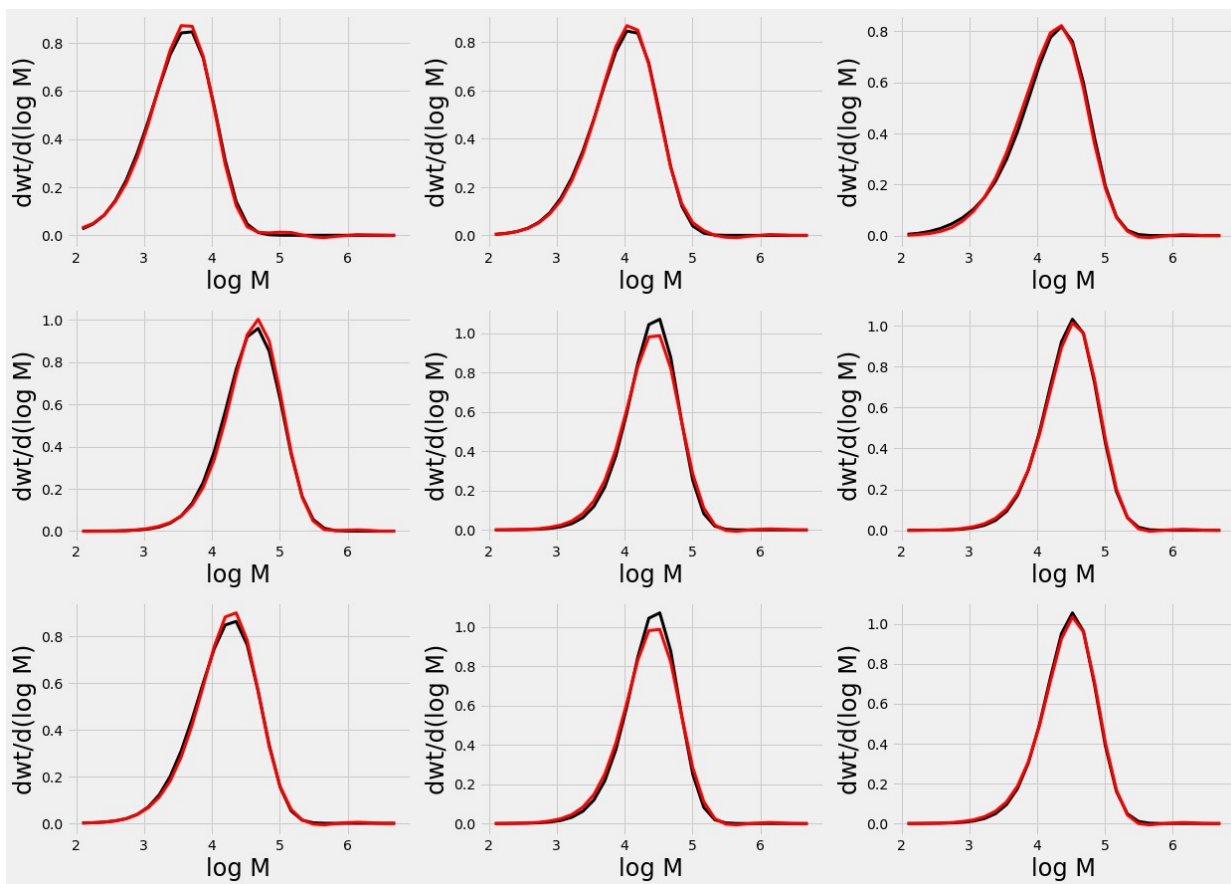

**Figure S2.** Performance of predictor of molecular weight distribution on 9 different randomly selected samples from the test set.

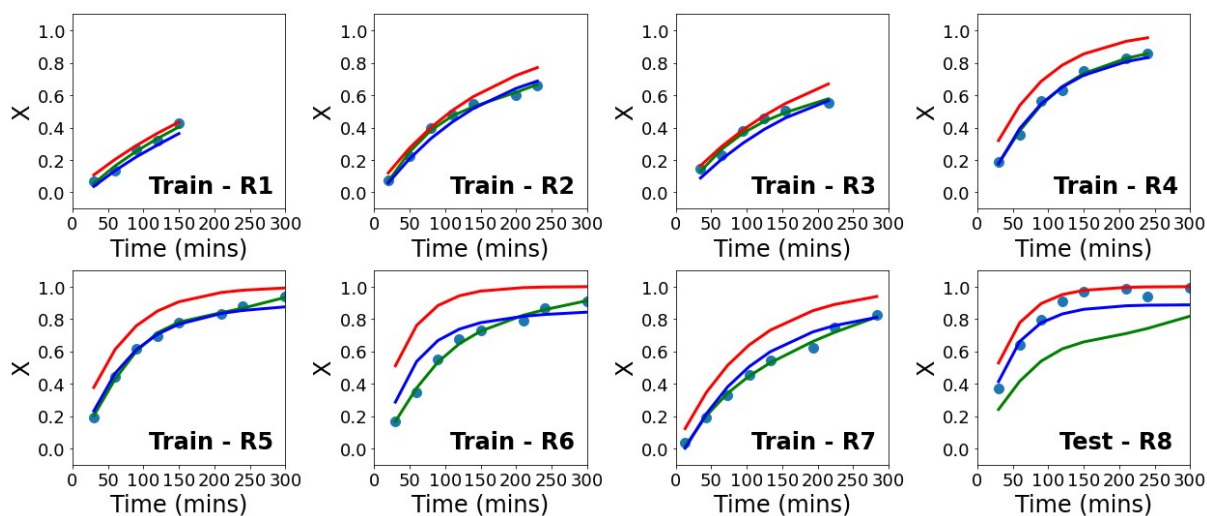

**Figure S3.** Evolution of conversion with time for experimental data (circles), in comparison to the theoretical evolution of conversion following equation 6 (red), a purely data-driven neural network (green), and a PCINN (blue). This data corresponds to the model trained using reactions **R1-R7** and tested on reaction **R8**.

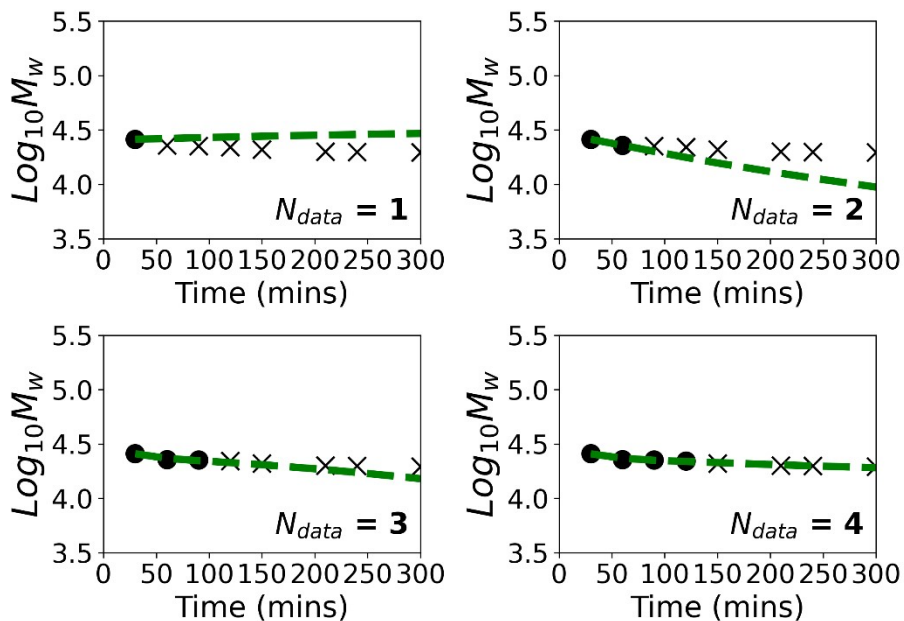

**Figure S4.** Predicted evolution of molecular weight with time (dashed lines) for purely data-driven neural network based on real-time updates with samples from reaction (Reaction 8). The crosses show future, as-yet unknown values while the circles show the measured values which are used as training data.

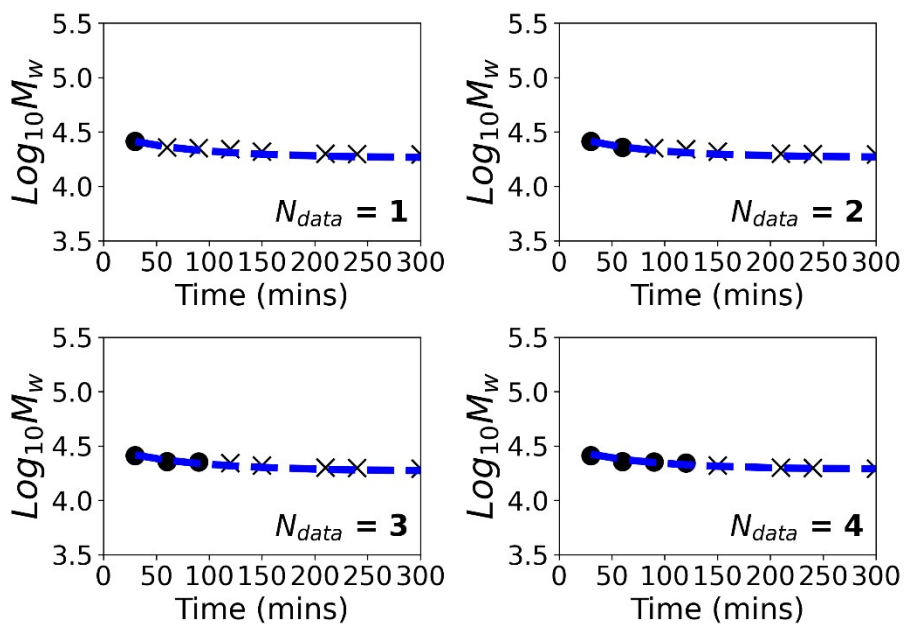

**Figure S5.** Predicted evolution of molecular weight with time (dashed lines) for PCINN based on real-time updates with samples from reaction (Reaction 8). The crosses show future, as-yet unknown values while the circles show the measured values which are used as training data.
