# Supplementary material for: Polymer chemistry informed neural networks (PCINNs) for data-driven modelling of polymerization processes
Source: Royal Society of Chemistry journal article supplement (doi:10.1039/d4py00995a), 2024-01-01
Supplement: d4py00995a2.xlsx [file d4py00995a2.xlsx]

## Sheet: PMMAordered
Experiment	time (s)	temp (K)	X	Mn (g/mol)	Mw (g/mol)	Mz (g/mol)	Mz+1 (g/mol)	Mv (g/mol)	Dispersity
1	1800	333	0.0666741	40527	77004	123977	172492	70954	1.90007
1	3600	333	0.13212	44456	82357	131292	182207	76068	1.85255
1	5400	333	0.264704	50857	87773	137076	189623	81504	1.72588
1	7200	333	0.31842	50783	83881	124406	164397	78501	1.65175
1	9000	333	0.426545	47807	88458	146501	213892	81396	1.85031
2	1200	343	0.0773667	23896	57550	99787	141376	52063	2.40835
2	3000	343	0.223025	26175	60407	102329	143819	54932	2.30781
2	4800	343	0.394534	27649	61732	103118	144035	56302	2.2327
2	6600	343	0.480695	29572	62850	104121	145955	57485	2.12532
2	8400	343	0.547894	31225	64243	106492	150423	58829	2.05742
2	12000	343	0.602815	32188	62833	102742	144185	57719	1.95206
2	13800	343	0.657414	29416	60894	102599	146997	55623	2.0701
3	2100	333	0.145129	19069	37213	61263	85560	34138	1.95149
3	3900	333	0.229773	19265	36751	59879	83436	33791	1.90766
3	5700	333	0.381622	18995	35617	57174	78364	32822	1.87507
3	7500	333	0.457603	17887	34078	55280	76513	31349	1.90518
3	9300	333	0.502756	18712	34238	54965	76074	31588	1.82973
3	12900	333	0.550904	16860	33070	55303	78842	30286	1.96145
4	1800	343	0.189478	6423	9581	13618	17888	9054	1.49167
4	3600	343	0.356434	5218	8818	13099	17509	8253	1.68992
4	5400	343	0.564068	4342	7682	11497	15171	7166	1.76923
4	7200	343	0.628691	4229	7609	11689	15856	7073	1.79924
4	9000	343	0.750108	4003	7218	10795	14202	6730	1.80315
4	12600	343	0.824802	3241	6554	10316	13833	6044	2.02222
4	14400	343	0.858348	3111	6519	10572	14556	5983	2.09547
5	1800	353	0.194529	12477	22937	51048	37039	21132	1.83834
5	3600	353	0.442344	12547	22876	50973	36711	21116	1.82322
5	5400	353	0.613292	13827	22890	47787	35006	21344	1.65546
5	7200	353	0.695181	12487	22018	48650	34919	20389	1.76327
5	9000	353	0.775349	11901	21197	46696	33690	19611	1.78111
5	12600	353	0.829253	11375	20913	48111	34086	19265	1.83851
5	14400	353	0.880089	11603	20736	47523	33577	19143	1.78712
5	18000	353	0.935662	11339	20278	44684	32258	18754	1.78834
6	1800	353	0.167314	3412	6311	9553	12532	5865	1.84965
6	3600	353	0.3477	4041	7268	11092	14876	6760	1.79856
6	5400	353	0.547515	3504	6442	9923	13434	5983	1.83847
6	7200	353	0.672834	3653	6288	9498	12730	5865	1.72132
6	9000	353	0.731472	2707	6135	10433	15035	5593	2.26635
6	12600	353	0.78932	2624	6435	11835	18004	5794	2.45236
6	14400	353	0.866223	2088	5564	9686	14086	5042	2.66475
6	18000	353	0.910425	1617	4527	8076	11388	4063	2.79963
7	800	343	0.0334407	15081	26011	40154	54459	24179	1.72475
7	2600	343	0.189172	14654	27175	42590	57813	25153	1.85444
7	4400	343	0.327304	16334	28078	43525	59599	26096	1.71899
7	6200	343	0.45176	13756	26371	42552	59633	24306	1.91705
7	8000	343	0.545936	14340	25486	39481	53556	23662	1.77727
7	11600	343	0.619724	14316	25238	39823	55330	23389	1.76292
7	13400	343	0.748032	13061	23286	37393	52686	21524	1.78287
7	17000	343	0.823217	10832	21909	36657	52377	20063	2.02262
8	1800	353	0.36901	16362	25918	38135	50451	24320	1.58404
8	3600	353	0.637917	10477	22836	37573	52679	20924	2.17963
8	5400	353	0.795971	11982	22532	35947	49921	20813	1.88049
8	7200	353	0.909871	12200	22010	35073	48888	20356	1.8041
8	9000	353	0.970881	11024	20951	34183	48182	19282	1.90049
8	12600	353	0.987606	9194	20009	33739	47937	18267	2.17631
8	14400	353	0.940702	9202	19830	33567	47611	18091	2.15497
8	18000	353	0.99	8215	19639	34300	49590	17798	2.39063
